# Supplementary material
Source: PubMed Central journal article supplement (PMC2637824)

## Supplemental Figures

Supplemental Figure 1: Time course of animal experiments. Numbers in parentheses reflect the number of animals in each experimental group.

Supplemental Figure 2: RP782 biodistribution in apoE<sup>-/-</sup> mouse. n=3 in each group. ID: injected dose.

# Supplemental Figure 1

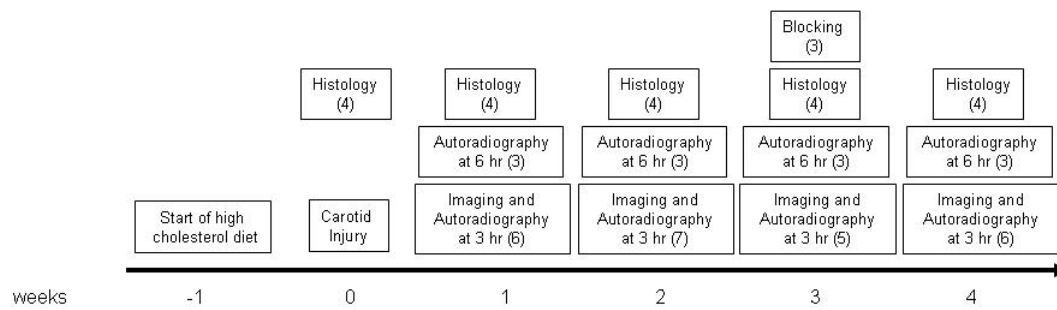

Supplemental Figure 2

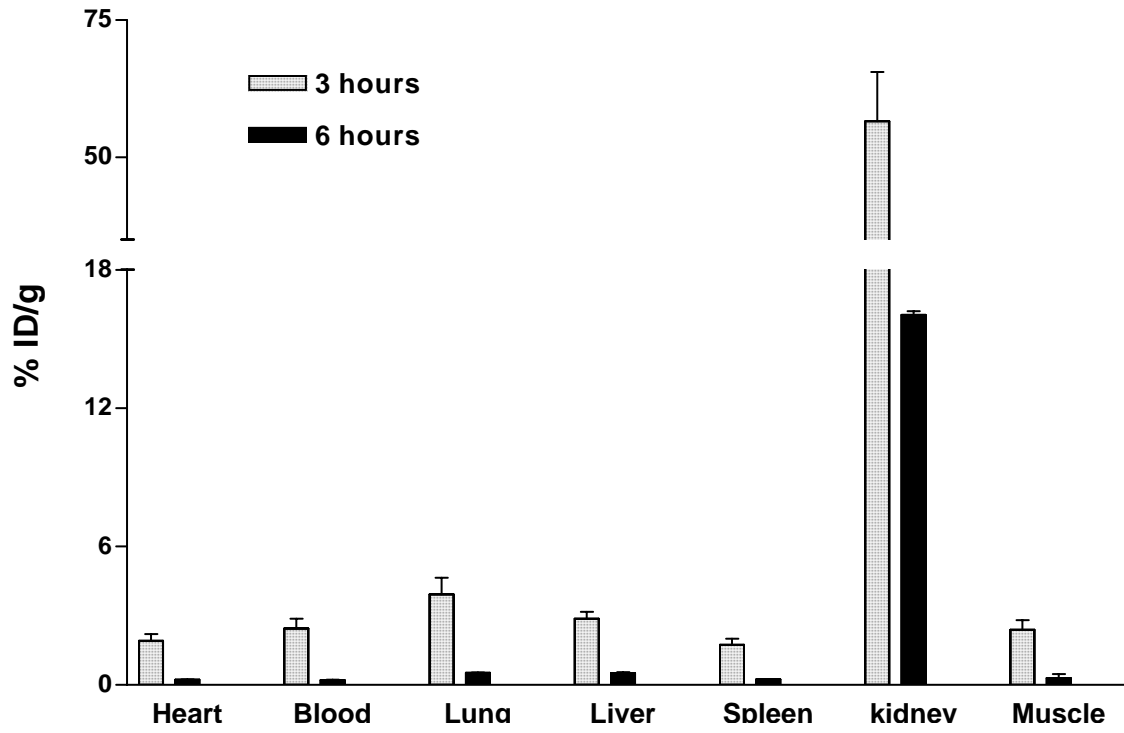

Supplement: NIHMS71327-supplement-supplement_1.pdf [file NIHMS71327-supplement-supplement_1.pdf]
